# Supplementary material
Source: PubMed Central journal article supplement (PMC125075)
Supplement: pnas_162086599_1.pdf [file pnas_162086599_1.pdf]

**Appendix 1. HIV treatment at wave 1 and change in general health from wave 1 to wave 3\***

|                                   | <u>Adhering to HAART treatment</u> |       |          | <u>Change in general health</u> |       |          |
|-----------------------------------|------------------------------------|-------|----------|---------------------------------|-------|----------|
|                                   | $\beta$                            | SE    | <i>P</i> | $\beta$                         | SE    | <i>P</i> |
| Using HAART                       | —                                  | —     | —        | 0.126                           | 0.064 | 0.048    |
| Using HAART and adhering          | —                                  | —     | —        | -0.191                          | 0.064 | 0.003    |
| Education (excluded, 0–11 years)  |                                    |       |          |                                 |       |          |
| 12 years                          | 0.041                              | 0.102 | 0.690    | 0.028                           | 0.072 | 0.691    |
| 13–15 years                       | 0.183                              | 0.102 | 0.073    | -0.035                          | 0.073 | 0.633    |
| 16+ years                         | 0.308                              | 0.122 | 0.012    | -0.088                          | 0.086 | 0.305    |
| Age                               | -0.021                             | 0.032 | 0.508    | 0.045                           | 0.020 | 0.026    |
| Age squared                       | 0.431                              | 0.377 | 0.254    | -0.442                          | 0.238 | 0.063    |
| Black                             | -0.332                             | 0.087 | 0.000    | -0.018                          | 0.061 | 0.770    |
| Female                            | -0.182                             | 0.102 | 0.074    | 0.196                           | 0.071 | 0.006    |
| Used intravenous drugs            | 0.200                              | 0.116 | 0.086    | 0.135                           | 0.082 | 0.098    |
| Male who has had sex with men     | 0.091                              | 0.096 | 0.345    | 0.096                           | 0.069 | 0.166    |
| Census region (excluded, West)    |                                    |       |          |                                 |       |          |
| Northeast                         | 0.298                              | 0.108 | 0.006    | -0.179                          | 0.077 | 0.020    |
| South                             | 0.343                              | 0.095 | 0.000    | -0.142                          | 0.066 | 0.032    |
| Midwest                           | 0.200                              | 0.117 | 0.087    | -0.032                          | 0.089 | 0.723    |
| Baseline CD4 count (excluded <50) |                                    |       |          |                                 |       |          |
| 500+                              | -0.383                             | 0.201 | 0.056    | 0.021                           | 0.109 | 0.850    |
| 200–499                           | -0.239                             | 0.094 | 0.011    | -0.152                          | 0.071 | 0.031    |
| 50–199                            | -0.095                             | 0.090 | 0.291    | -0.064                          | 0.069 | 0.358    |
| Baseline health (excluded, poor)  |                                    |       |          |                                 |       |          |
| Excellent/very good               | 0.294                              | 0.139 | 0.034    | 2.063                           | 0.113 | 0.000    |
| Good                              | 0.200                              | 0.140 | 0.154    | 1.100                           | 0.113 | 0.000    |
| Fair                              | 0.022                              | 0.139 | 0.876    | 0.663                           | 0.112 | 0.000    |
| Insurance (excluded, none)        |                                    |       |          |                                 |       |          |
| Medicaid                          | 0.009                              | 0.123 | 0.942    | 0.280                           | 0.083 | 0.001    |
| Medicare                          | 0.139                              | 0.151 | 0.357    | 0.301                           | 0.108 | 0.005    |
| Private insurance                 | 0.002                              | 0.126 | 0.985    | 0.134                           | 0.086 | 0.118    |
| Medicaid and Medicare Income      | 0.099                              | 0.133 | 0.454    | 0.195                           | 0.093 | 0.035    |
| Income                            |                                    |       |          |                                 |       |          |
| 2nd Quartile                      | 0.021                              | 0.115 | 0.855    | 0.084                           | 0.077 | 0.273    |
| 3rd Quartile                      | -0.017                             | 0.114 | 0.880    | -0.067                          | 0.080 | 0.400    |
| 4th Quartile                      | 0.077                              | 0.138 | 0.579    | -0.141                          | 0.096 | 0.142    |

Notes: see Table 2.

\*Full model results for Table 2.
