# Supplementary material
Source: PubMed Central journal article supplement (PMC125075)
Supplement: pnas_162086599_2.pdf [file pnas_162086599_2.pdf]

**Appendix 2. Change in general health status between wave 1 and wave 4\***

|                                            | $\beta$ | <u>Change in general health</u><br>SE | <i>P</i> |
|--------------------------------------------|---------|---------------------------------------|----------|
| <hr/>                                      |         |                                       |          |
| Years of schooling (excluded, 0–11 years)  |         |                                       |          |
| 12 years                                   | –0.164  | 0.101                                 | 0.105    |
| 13–15 years                                | –0.248  | 0.127                                 | 0.051    |
| 16 or more years                           | –0.199  | 0.142                                 | 0.160    |
| <hr/>                                      |         |                                       |          |
| Wave 1, respondent health (excluded, good) |         |                                       |          |
| Excellent                                  | 1.665   | 0.323                                 | <.001    |
| Very Good                                  | 0.756   | 0.135                                 | <.001    |
| Fair                                       | –0.633  | 0.104                                 | <.001    |
| Poor                                       | –1.474  | 0.128                                 | <.001    |
| <hr/>                                      |         |                                       |          |
| Poor self-maintenance behavior             | 0.246   | 0.102                                 | 0.016    |
| Birth year (excluded, before 1935)         |         |                                       |          |
| 1935–1937                                  | –0.131  | 0.107                                 | 0.222    |
| 1938+                                      | 0.141   | 0.094                                 | 0.134    |
| Female                                     | –0.099  | 0.084                                 | 0.240    |
| Black                                      | 0.229   | 0.095                                 | 0.016    |
| Hispanic                                   | 0.357   | 0.131                                 | 0.006    |

Notes: see Table 5.

\*Full model results for Table 5.
