# Supplementary material
Source: PubMed Central journal article supplement (PMC125075)
Supplement: pnas_162086599_3.pdf [file pnas_162086599_3.pdf]

**Appendix 3. Poor self-maintenance behavior\***

|                                                 | <u>Without WAIS score</u> |       |          | <u>With WAIS score</u> |       |          |
|-------------------------------------------------|---------------------------|-------|----------|------------------------|-------|----------|
|                                                 | $\beta$                   | SE    | <i>P</i> | $\beta$                | SE    | <i>P</i> |
| Intercept                                       | -0.774                    | 0.156 | <.0001   | -0.558                 | 0.178 | <.0001   |
| Years of schooling<br>(excluded, 0–11 years)    |                           |       |          |                        |       |          |
| 12 years                                        | -0.240                    | 0.121 | 0.047    | -0.151                 | 0.124 | 0.224    |
| 13–15 years                                     | -0.284                    | 0.152 | 0.061    | -0.142                 | 0.160 | 0.373    |
| 16 or more years                                | -0.303                    | 0.168 | 0.072    | -0.065                 | 0.185 | 0.724    |
| Birth year (excluded, before 1935)              |                           |       |          |                        |       |          |
| 1935–1937                                       | 0.213                     | 0.128 | 0.096    | 0.231                  | 0.129 | 0.073    |
| 1938+                                           | 0.101                     | 0.116 | 0.384    | 0.122                  | 0.117 | 0.294    |
| Female                                          | 0.083                     | 0.109 | 0.442    | 0.094                  | 0.109 | 0.388    |
| Black                                           | 0.110                     | 0.115 | 0.338    | 0.011                  | 0.120 | 0.927    |
| Hispanic                                        | 0.013                     | 0.158 | 0.933    | -0.045                 | 0.159 | 0.780    |
| Marital status                                  |                           |       |          |                        |       |          |
| Married waves 1 and 4                           | -0.078                    | 0.120 | 0.517    | -0.076                 | 0.120 | 0.526    |
| Married wave 1 and not married wave 4           | 0.492                     | 0.304 | 0.106    | 0.546                  | 0.305 | 0.073    |
| Not married wave 1 and married wave 4           | 0.071                     | 0.426 | 0.868    | 0.083                  | 0.437 | 0.849    |
| Female & married wave 1 &<br>not married wave 4 | -0.580                    | 0.378 | 0.126    | -0.601                 | 0.378 | 0.112    |
| Proxy respondent                                | -0.267                    | 0.313 | 0.394    | -0.241                 | 0.310 | 0.438    |
| WAIS score                                      | —                         | —     | —        | -0.057                 | 0.020 | 0.004    |
| WAIS score missing                              | —                         | —     | —        | 0.258                  | 0.172 | 0.135    |

Notes: see Table 6.

\*Full model results for Table 6.
